# Supplementary material
Source: publisher figshare collection journal article supplement (https://acs.figshare.com/ndownloader/files/4192819)
Supplement: Supplementary file 1 [file 4192819]

# Protein Dynamics of Isolated Chains of Recombinant Human Hemoglobin Elucidated by Time-resolved Resonance Raman Spectroscopy

Kenta Yamada, Haruto Ishikawa, and Yasuhisa Mizutani\*

Department of Chemistry, Graduate School of Science, Osaka University,  
1-1 Machikaneyama, Toyonaka, Osaka 560-0043, Japan

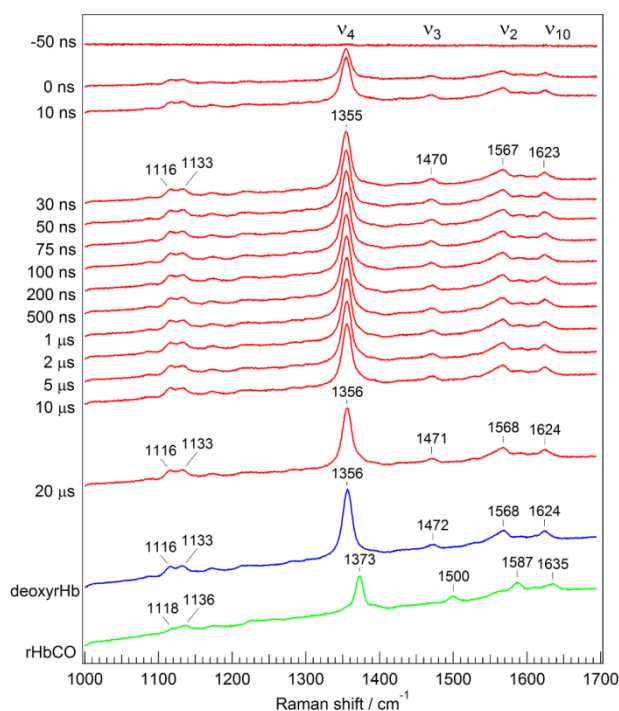

**Figure S1.** Time-resolved RR spectra in the 1000 to 1700  $\text{cm}^{-1}$  region at the indicated delay time carbonmonoxy rHb following the CO photolysis. Spectra of the equilibrium states of the deoxy and CO-bound forms are depicted at the bottom for comparison. Time-resolved difference spectra were generated by subtracting the probe-only spectrum from the pump-probe spectrum at each delay time. The accumulation time for obtaining each spectrum is 18 min.

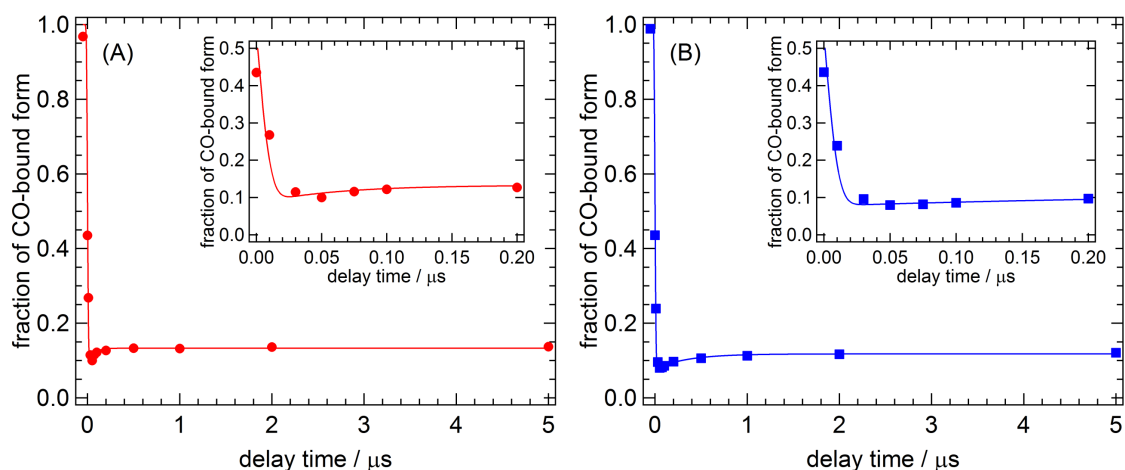

**Figure S2.** Fractions of the CO-bound form of the isolated  $\alpha$ - (A) and  $\beta$ - (B) chains in the range of -0.05 to 5  $\mu$ s. The fractions were calculated based on the  $\nu_4$  band intensity in the pump-probe spectra at each delay time relative to the band intensity in the probe-only spectrum. The solid circles and squares indicate the fraction CO-bound form of the  $\alpha$ - and  $\beta$ -chains, respectively. The solid lines are the best-fit to an exponential function of the form  $[A + B\exp(-kt)]$  convoluted with the instrument response function. The values of  $A$  and  $B$  were estimated to be  $0.13 \pm 0.02$  ( $0.12 \pm 0.03$ ) and  $-0.05 \pm 0.06$  ( $-0.04 \pm 0.03$ ) for  $\alpha$ - and ( $\beta$ -) chains, respectively. The rates of geminate recombination  $k$  for the isolated  $\alpha$ - and  $\beta$ -chains were  $17 \pm 39$  and  $2.9 \pm 7.6 \mu\text{s}^{-1}$ , respectively. Inset: Magnified views of fractions of the CO-bound form of the isolated chains in the range of 0.0 to 0.2  $\mu$ s.
